# Supplementary material
Source: MDPI journal article supplement (https://www.mdpi.com/2311-7524/5/4/78)
Supplement: s1 [file s1]

2.3 experiment arrangement: identification of disease symptoms at 28 DPI

| Grafted combination | 1st experiment | 2nd experiment | 3rd experiment | Total plants |
|---------------------|----------------|----------------|----------------|--------------|
| S21/S21             | 20             | 20             | 20             | 60           |
| Rf/S21              | 20             | 20             | 20             | 60           |
| Rf/Rf               | 20             | 20             | 20             | 60           |
| Rf (non-grafted)    | 20             | 20             | 20             | 60           |
| Total plants        | 80             | 80             | 80             | 240          |

2.4 experiment arrangement: Measurement of Plant Growth Situation at 28 DPI

| Grafted combination | 1st experiment | 2nd experiment | 3rd experiment | Total plants |
|---------------------|----------------|----------------|----------------|--------------|
| S21/S21             | 10             | 10             | 10             | 30           |
| Rf/S21              | 10             | 10             | 10             | 30           |
| Rf/Rf               | 10             | 10             | 10             | 30           |
| Total plants        | 30             | 30             | 30             | 90           |

2.5 experiment arrangement: Determination of EPS Content and Cell Wall Degrading Enzymes (CWDEs) Activity in Grafted Plants

| Grafted combination | 1st experiment |       |        |        | 2nd experiment |       |        |        | 3rd experiment |       |        |        | Total plants |
|---------------------|----------------|-------|--------|--------|----------------|-------|--------|--------|----------------|-------|--------|--------|--------------|
|                     | 0 DPI          | 7 DPI | 14 DPI | 28 DPI | 0 DPI          | 7 DPI | 14 DPI | 28 DPI | 0 DPI          | 7 DPI | 14 DPI | 28 DPI |              |
| S21/S21             | 10             | 10    | 10     | 10     | 10             | 10    | 10     | 10     | 10             | 10    | 10     | 10     | 120          |
| Rf/S21              | 10             | 10    | 10     | 10     | 10             | 10    | 10     | 10     | 10             | 10    | 10     | 10     | 120          |
| Rf/Rf               | 10             | 10    | 10     | 10     | 10             | 10    | 10     | 10     | 10             | 10    | 10     | 10     | 120          |
| Total plants        | 30             | 30    | 30     | 30     | 30             | 30    | 30     | 30     | 30             | 30    | 30     | 30     | 360          |

Table S1 Experiment arrangement.
